# Supplementary material for: Intuitive weights of harm for therapeutic decision making in smear-negative pulmonary Tuberculosis: an interview study of physicians in India, Pakistan and Bangladesh
Source: BMC Med Inform Decis Mak. 2014 Aug 8;14:67. doi: 10.1186/1472-6947-14-67 (PMC4127046; doi:10.1186/1472-6947-14-67)
Supplement: Additional file 2 — Original database for demographic factors and responses provided by physicians. [file 1472-6947-14-67-S2.xls]

## Sheet: Sheet1
							Case fatality tuberculosis	Morbidity tuberculosis	Remission tuberculosis	Probability side effects	Mortality side effects	Morbidity side effects	Remission side effects	Percentage expected health status related with disease	Percentage health status related with treatment	Regret false positive	Regret false negative	Weight provoked justified	Weight provoked unjustified death	Weight death by omission
age (in years)	gender	experience (in years)	category	specialization	type of specialty	country	cs_1a	cs_1b	cs_1c	cs_2	cs_3a	cs_3b	cs_3c	cs_4	cs_5	cs_6a	cs_6b	rgrt_1	rgrt_2	rgrt_3
32	1	9	3	1	5	3	70	20	10	10	10	50	40	20	10	5	9	1	2	2
35	2	11	3	1	1	3	60	30	10	20	5	80	15	15	80	10	10	1	5	2
48	1	24	2	2	111	3	90	8	2	10	10	10	80	25	90	5	10	1	2	4
28	1	4	2	2	111	3	60	20	20	10	5	15	80	70	60	8	10	1	4	2
31	1	5	2	2	111	3	60	20	20	3	2	0	98	20	80	3	8	1	1	3
44	1	21	3	1	1	3	30	60	10	10	0	80	20	30	60	4	9	1	1	3
45	1	20	3	1	1	3	50	30	20	20	10	50	40	70	80	9	4	1	3	5
25	1	0.6	1	2	111	3	65	25	10	30	20	30	50	50	50	3	9	2	2	3
32	1	8	3	1	1	3	98	8	2	10	10	20	70	10	40	2	10	2	3	3
24	2	0.5	1	2	111	3	20	30	50	20	40	40	20	20	20	4	5	3	4	5
24	1	0.5	1	2	111	3	90	7	3	20	20	70	10	10	70	3	10	2	3	3
25	2	0.7	1	2	111	3	18	80	2	60	17	80	3	10	75	5	10	1	3	2
25	1	0.9	1	2	111	3	86	10	4	15	10	20	70	12	9	3	9	1	2	3
24	1	0.6	1	2	111	3	15	25	60	25	15	35	50	10	40	3	9	1	2	3
24	2	0.8	1	2	111	3	70	20	10	10	40	35	25	25	40	8	7	3	4	2
25	1	1	1	2	111	3	50	30	20	20	30	40	30	20	10	4	7	1	5	3
24	2	0.8	1	2	111	3	70	10	20	5	1	60	39	30	40	7	9	2	5	3
24	1	0.9	1	2	111	3	90	3	7	20	30	50	20	25	40	7	9	2	4	1
25	1	1	1	2	111	3	30	50	20	15	10	70	20	30	10	6	7	1	2	2
33	1	8	2	2	111	3	60	25	15	15	15	25	60	45	30	3	10	2	4	5
34	1	10	3	1	5	3	70	20	10	10	1	5	94	80	90	2	10	2	1	1
40	1	13	2	2	111	3	30	60	10	10	70	30	0	30	50	5	10	4	7	7
35	1	10	2	2	111	3	90	8	2	5	5	10	85	50	40	1	10	1	2	4
33	1	9	2	2	111	3	19	21	60	3	2	21	77	25	95	10	10	1	4	5
33	1	9	2	2	111	3	70	5	25	10	80	5	15	50	60	1	9	1	2	2
32	1	8	2	2	111	3	60	28	12	30	55	18	27	45	50	4	10	2	3	5
38	1	12	2	2	111	3	55	17	28	5	2	26	72	4	90	0	10	1	2	4
40	1	14	2	2	111	3	70	20	10	10	10	50	40	30	70	4	9	2	1	1
32	1	8	2	2	111	3	50	25	25	5	20	20	60	50	60	2	9	1	2	3
31	1	8	2	2	111	3	90	10	0	20	20	20	60	30	60	4	7	3	4	6
30	1	7	2	2	111	3	90	5	5	20	60	20	20	50	60	10	10	2	2	4
32	1	8	2	2	111	3	60	20	20	30	5	10	85	70	60	10	6	1	4	2
41	1	16	2	2	111	3	70	20	10	50	15	15	70	20	10	1	10	1	2	1
36	1	11	3	1	3	3	70	20	10	5	25	25	50	60	10	9	1	2	2	10
37	1	11	3	1	3	3	20	70	10	20	10	40	50	40	50	2	8	1	2	1
38	1	12	2	2	111	3	40	60	0	30	2	10	88	25	50	3	8	1	2	3
40	1	15	3	1	1	3	20	80	0	5	5	5	90	10	95	7	10	1	2	2
32	2	10	2	2	111	3	20	75	5	10	20	40	40	50	40	0	10	1	1	5
36	1	10	2	2	111	3	20	50	30	10	20	20	60	70	40	7	7	2	2	4
40	1	15	3	1	1	3	10	20	70	20	1	81	18	50	50	2	7	1	2	3
33	1	8	2	2	111	3	60	20	20	10	20	50	30	50	75	2	9	2	3	5
32	2	7	2	2	111	3	5	55	40	20	30	40	30	50	40	10	9	2	4	3
40	1	14	3	1	5	3	30	65	5	5	1	2	97	30	50	3	6	1	2	2
39	1	12	2	1	6	3	90	10	0	25	10	10	80	40	50	1	10	1	2	4
24	2	1	1	2	111	3	10	40	50	40	10	40	50	20	15	4	7	1	2	1
24	2	0.8	1	2	111	3	20	70	10	15	5	15	80	20	5	10	10	1	2	1
23	2	1	1	2	111	3	5	15	80	2	5	10	85	90	20	7	9	1	2	2
24	2	1	1	2	111	3	15	60	25	60	20	70	10	30	10	5	10	1	2	1
24	1	0.8	1	2	111	3	15	60	25	10	5	15	80	20	30	10	10	1	2	1
33	2	9	3	1	2	3	90	8	2	5	2	78	20	5	50	0	10	2	3	4
24	2	1	1	2	111	3	95	5	0	40	10	30	60	60	30	2	9	1	2	1
40	1	12	3	1	6	3	70	15	15	10	5	70	25	60	50	8	10	1	2	3
55	1	30	5	2	111	3	80	15	5	3	2	5	93	10	26	7	5	1	1	1
51	1	29	5	2	111	3	76	20	4	4	2	6	92	25	26	9	9	1	1	3
52	1	27	5	2	111	3	80	16	4	5	1	3	96	30	30	8	8	1	2	1
33	1	8	2	2	111	3	80	18	2	5	8	10	82	50	50	5	1	1	2	1
32	1	7	2	2	111	3	50	25	25	5	2	5	93	50	10	2	1	1	1	1
36	1	12	2	2	111	3	95	4	1	5	50	25	25	9	50	2	2	2	1	1
52	1	29	5	1	5	3	80	20	0	20	5	85	10	50	50	7	2	1	1	3
47	1	14	5	2	111	3	85	13	2	5	6	82	12	20	30	2	5	1	1	1
52	1	26	5	1	6	3	50	30	20	2	1	90	9	30	30	6	10	1	1	3
55	1	25	5	2	111	3	20	50	30	6	4	2	94	15	20	6	4	1	1	3
50	1	20	5	2	111	3	80	20	0	10	80	20	0	50	2	8	5	1	1	1
30	2	6	2	2	111	3	80	20	0	60	60	40	0	50	60	3	2	1	1	1
53	1	29	5	2	111	3	25	50	25	3	20	60	20	50	10	10	10	1	1	1
30	2	4	2	1	5	3	10	20	70	40	90	10	0	30	10	6	9	1	1	3
56	1	25	2	2	111	3	100	0	0	5	90	10	0	10	5	9	0	1	2	1
58	1	30	5	2	111	3	80	20	0	20	20	60	20	20	10	6	7	1	1	1
50	1	23	2	2	111	3	80	20	0	20	20	60	20	50	10	5	6	1	1	1
50	1	25	5	2	111	3	100	0	0	5	90	10	0	40	10	8	5	1	1	3
34	2	7	2	2	111	3	5	85	10	2	10	80	10	10	5	8	5	1	1	3
28	1	4	2	2	111	3	60	30	10	70	80	10	10	0	10	0	0	1	1	1
35	1	11	3	1	3	3	100	0	0	5	1	4	95	5	60	0	0	1	1	1
30	1	5	2	2	111	3	100	0	0	10	1	4	95	10	55	0	0	1	2	1
57	1	29	2	2	111	3	100	0	0	3	1	8	91	5	50	1	0	1	2	1
40	1	14	2	2	111	3	100	0	0	5	100	0	0	2	40	1	0	1	1	1
28	1	5	2	1	3	3	97	2	1	4	80	10	10	15	50	2	1	1	1	3
38	1	13	3	1	6	3	60	30	10	10	10	20	70	60	80	5	10	2	3	4
37	1	13	3	1	6	3	40	30	30	15	0	30	70	20	90	5	10	2	10	10
35	1	9	3	1	6	3	70	25	5	10	5	35	60	30	50	6	10	4	7	10
48	1	14	3	1	6	3	45	25	30	10	8	32	60	30	66	0	1	1	2	1
23	1	0.8	1	2	111	1	20	40	40	10	5	15	80	30	80	1	7	1	3	3
24	2	0.4	1	2	111	1	65	30	5	5	10	20	70	20	95	1	6	2	3	3
22	1	0.3	1	2	111	1	60	30	10	3	15	15	70	10	80	2	6	1	2	4
21	1	0.3	1	2	111	1	30	30	60	12	5	5	90	50	90	4	8	2	4	5
23	1	0.2	1	2	111	1	40	40	20	7	10	10	80	40	85	2	9	1	3	4
22	1	0.5	1	2	111	1	50	25	25	15	1	4	95	10	30	1	7	1	2	3
24	2	0.4	1	2	111	1	65	30	5	6	5	10	85	60	50	3	6	1	2	4
21	2	0.7	1	2	111	1	60	30	10	9	5	25	70	20	70	5	8	1	3	5
23	1	0.8	1	2	111	1	65	20	15	17	2	8	90	50	80	3	9	2	4	5
23	2	0.6	1	2	111	1	65	15	20	20	5	5	90	30	75	2	9	2	4	4
23	2	0.3	1	2	111	1	70	20	10	1	5	5	90	30	85	1	10	2	3	4
23	1	0.3	1	2	111	1	80	20	0	5	5	10	85	10	30	1	5	1	2	3
22	1	0.4	1	2	111	1	90	10	0	10	5	15	80	20	50	2	6	1	3	4
22	2	0.4	1	2	111	1	40	20	40	0	5	25	70	40	70	3	7	1	3	5
22	1	0.7	1	2	111	1	60	10	30	0	20	20	60	60	80	1	8	1	2	4
23	2	0.7	1	2	111	1	65	5	30	12	25	25	50	30	90	1	9	3	4	5
23	2	0.8	1	2	111	1	45	5	45	8	3	7	90	30	35	1	9	1	4	3
27	1	2	2	2	111	1	60	20	20	10	10	30	60	50	50	2	8	1	2	2
29	2	1	2	2	111	1	70	20	10	20	25	25	50	50	40	1	9	2	1	2
26	2	3	2	2	111	1	60	10	30	15	15	30	45	40	20	2	8	1	2	3
37	1	8	2	1	1	1	65	5	30	13	2	8	90	30	90	1	8	1	4	5
42	1	10	2	1	2	1	70	10	20	8	1	9	90	40	80	1	9	2	3	4
41	1	9	2	1	1	1	65	10	25	4	5	15	80	20	90	1	10	1	4	5
48	1	12	2	1	1	1	75	5	20	6	5	10	85	10	85	2	10	1	4	6
37	2	8	2	1	2	1	80	5	15	7	1	9	90	10	95	1	10	2	3	5
40	2	9	2	1	2	1	65	5	30	3	5	5	90	15	95	1	9	1	3	4
43	1	10	2	1	3	1	65	5	30	5	3	7	90	20	95	1	10	1	4	5
28	1	2	3	1	3	1	60	10	30	6	1	4	95	15	80	1	10	1	5	7
25	1	1	3	1	4	1	40	40	20	9	8	20	72	10	90	2	10	1	2	4
27	1	3	3	1	3	1	70	10	20	10	5	20	75	20	75	1	9	1	3	4
31	1	4	3	1	3	1	70	10	20	3	10	10	80	25	80	1	8	1	2	5
29	2	4	3	1	2	1	65	5	30	4	5	10	85	15	95	2	9	2	3	5
28	2	3	3	1	2	1	60	10	30	8	1	9	90	30	65	1	5	1	4	3
26	1	2	3	1	3	1	75	5	20	7	2	8	90	20	75	1	6	2	3	4
29	2	3	3	1	2	1	85	5	10	6	5	15	80	10	95	2	9	2	4	5
27	1	2	3	1	1	1	80	10	10	12	5	20	75	35	80	2	8	1	4	5
26	2	3	3	1	2	1	75	5	20	11	5	5	90	15	80	2	10	2	4	5
27	2	3	3	1	2	1	65	10	25	9	4	6	90	10	95	1	10	1	4	5
30	2	2	3	1	3	1	80	5	15	10	5	10	85	20	90	3	10	2	3	4
29	1	3	3	1	3	1	90	5	5	1	4	6	90	20	85	2	10	1	3	4
30	1	3	3	1	3	1	70	10	20	2	2	10	88	10	70	3	9	1	3	4
32	1	4	3	1	3	1	60	10	30	5	1	9	90	10	85	1	9	1	2	4
28	1	3	3	1	1	1	70	5	25	3	10	10	80	30	80	2	9	2	3	5
29	2	3	3	1	1	1	65	5	30	2	3	7	90	25	95	1	9	3	4	4
26	1	2	3	1	4	1	75	5	20	6	5	20	75	20	70	1	8	1	3	5
27	1	3	3	1	1	1	75	10	15	3	6	25	69	20	80	1	7	2	3	4
30	2	2	3	1	1	1	45	20	35	5	2	8	90	10	90	3	9	1	4	5
29	1	2	3	1	4	1	80	5	15	19	9	20	71	10	80	1	8	1	2	4
27	2	2	3	1	1	1	70	5	25	12	5	10	85	10	75	2	10	1	3	5
31	2	2	3	1	1	1	70	5	25	5	5	10	85	20	85	1	10	1	3	3
30	2	3	3	1	1	1	65	5	35	6	3	7	90	15	95	2	9	1	3	3
49	1	15	4	1	5	1	75	5	20	4	1	4	95	10	70	1	9	1	3	4
39	1	8	4	1	1	1	80	5	15	3	3	7	90	15	80	1	10	1	4	5
38	1	9	4	1	1	1	65	5	30	6	6	9	85	20	65	1	10	1	3	4
40	1	10	4	1	5	1	70	10	20	7	2	8	90	10	80	1	9	1	4	5
47	1	12	4	1	1	1	75	5	20	2	3	7	90	30	90	1	10	2	2	4
35	1	8	4	1	1	1	80	5	15	1	2	5	93	25	75	2	8	2	3	3
38	2	8	4	1	5	1	85	5	10	5	5	15	80	15	60	1	9	1	2	4
33	1	6	4	1	1	1	90	3	7	4	5	10	85	20	70	1	10	2	3	3
40	2	9	4	1	5	1	70	5	25	6	5	15	80	15	80	1	10	2	4	4
43	2	10	4	1	5	1	80	5	15	3	5	20	75	10	95	2	9	3	3	5
42	1	11	4	1	1	1	75	5	20	5	5	30	65	20	90	2	8	1	4	5
38	1	7	4	1	1	1	65	5	30	7	5	15	80	20	80	1	9	2	3	4
34	2	5	4	1	2	1	60	10	30	9	5	10	85	15	75	2	9	2	3	4
37	2	6	4	1	2	1	70	10	20	8	5	5	90	10	80	1	8	1	3	4
38	2	8	4	1	2	1	70	5	25	4	10	10	80	10	90	2	10	2	2	5
37	1	6	4	1	3	1	80	5	15	3	5	20	75	20	85	1	9	2	2	5
31	1	4	4	1	3	1	75	5	20	5	5	30	65	20	85	2	10	1	2	3
40	1	9	4	1	3	1	80	5	15	3	3	7	90	15	80	1	9	1	3	4
47	1	10	4	1	3	1	70	5	25	2	2	8	90	10	90	1	10	1	4	4
46	1	10	4	1	4	1	65	5	30	5	1	4	95	15	75	1	10	1	3	3
35	1	7	4	1	4	1	75	5	20	6	5	15	80	15	75	2	9	1	3	3
46	1	10	4	1	4	1	65	10	25	7	2	8	90	15	85	1	9	1	2	5
45	1	10	5	2	111	1	65	10	25	3	5	5	90	10	80	1	10	1	3	4
49	1	8	5	2	111	1	70	5	25	4	3	7	90	15	90	1	10	1	2	3
41	2	9	5	1	1	1	80	5	15	5	4	12	84	10	85	1	10	1	3	4
39	2	8	5	1	1	1	65	5	30	3	5	15	80	10	90	1	9	1	3	5
23	1	0.8	1	2	111	2	20	40	40	10	5	15	80	30	80	1	7	1	3	3
23	2	0.4	1	2	111	2	65	30	5	5	10	20	70	20	95	1	6	2	3	3
22	1	0.3	1	2	111	2	60	30	10	3	15	15	70	10	80	2	6	1	2	4
21	1	0.3	1	2	111	2	10	30	60	12	5	5	90	50	90	4	8	2	4	5
23	1	0.2	1	2	111	2	40	40	20	7	10	10	80	40	85	2	9	1	3	4
22	1	0.5	1	2	111	2	50	25	25	15	1	4	95	10	30	1	7	1	2	3
24	2	0.4	1	2	111	2	65	30	5	6	5	10	85	60	50	3	6	1	2	4
21	2	0.7	1	2	111	2	60	30	10	9	5	25	70	20	70	5	8	1	3	5
23	1	0.8	1	2	111	2	65	20	15	17	2	8	90	50	80	3	9	2	4	5
24	1	0.2	1	2	111	2	75	15	10	30	30	50	20	15	80	3	10	1	3	10
25	2	0.1	1	2	111	2	70	20	10	30	40	40	20	30	40	6	10	2	3	4
26	1	1	1	2	111	2	70	29	1	10	2	40	58	30	54	6	10	1	4	10
25	1	1	1	2	111	2	40	55	5	5	2	8	90	30	30	6	10	1	2	3
23	2	1	1	2	111	2	90	9	1	50	80	15	5	20	40	3	10	1	2	4
25	2	1	1	2	111	2	75	15	10	50	25	25	50	80	50	1	8	2	3	2
23	2	0.1	1	2	111	2	73	20	7	23	43	30	17	83	90	5	10	1	4	10
31	1	4	4	1	1	2	50	25	25	5	5	20	75	40	10	10	10	2	10	10
25	1	1	1	2	111	2	50	30	10	20	10	40	50	50	40	7	8	2	6	7
28	1	4	1	1	1	2	80	20	0	25	80	20	0	10	10	5	10	1	2	3
28	2	4	4	1	1	2	60	20	20	10	20	20	60	45	10	10	10	2	2	3
27	2	2	4	1	1	2	90	5	5	15	2	78	20	10	30	3	15	3	10	10
26	2	1	1	2	111	2	8	90	2	50	20	10	70	25	15	4	8	5	9	10
25	1	1	1	2	111	2	25	70	5	5	2	48	50	50	60	1	7	2	5	10
27	1	2	4	1	1	2	80	10	10	15	10	60	30	40	50	10	8	2	8	7
28	2	2	1	2	111	2	9	90	1	50	20	10	70	25	15	4	8	2	9	10
23	1	0.2	1	2	111	2	90	2	8	5	25	60	15	40	60	10	9	4	8	10
25	1	1	1	2	111	2	30	60	10	95	18	2	80	20	40	5	8	0	5	8
27	1	1	1	2	111	2	70	10	20	5	20	50	30	10	70	6	10	5	10	10
26	1	2	1	2	111	2	60	40	20	15	30	50	20	15	70	6	10	1	2	3
26	1	2	1	2	111	2	60	30	10	20	20	40	40	40	40	8	9	4	4	2
24	1	1	1	2	111	2	10	30	60	30	50	30	20	35	30	6	7	5	5	3
26	2	2	1	2	111	2	35	45	20	35	40	50	10	10	20	6	9	5	5	8
27	1	1.5	4	1	1	2	30	20	50	5	15	15	70	20	20	7	10	2	2	3
27	1	2	4	1	1	2	30	30	40	10	15	15	70	30	20	7	10	2	3	3
26	2	3	4	1	1	2	50	20	30	20	20	30	50	30	20	7	9	1	2	3
25	2	1	1	2	111	2	20	40	40	15	15	30	55	20	45	6	7	2	2	3
27	2	3	1	2	111	2	50	30	20	40	40	30	30	20	20	7	10	2	2	4
26	2	1.5	1	2	111	2	70	20	10	50	70	20	10	50	60	9	4	1	2	1
28	2	3	4	1	1	2	70	10	20	20	80	25	5	10	50	6	10	1	2	3
27	1	3	1	2	111	2	70	10	20	10	20	60	20	15	75	6	10	5	6	4
26	2	2	1	2	111	2	80	15	5	80	75	20	5	25	40	10	9	2	1	2
28	2	3	4	1	1	2	80	10	10	25	80	15	5	10	40	5	10	1	2	3
29	1	1	1	2	111	2	50	40	10	20	5	5	90	30	90	1	10	1	3	3
24	1	1	1	2	111	2	25	35	40	15	10	10	80	40	85	2	7	1	4	3
24	2	0.6	1	2	111	2	65	30	5	15	10	20	70	20	95	2	6	2	4	3
23	1	0.3	1	2	111	2	60	25	15	30	15	15	70	10	80	2	7	1	3	4
23	1	0.3	1	2	111	2	10	30	60	12	5	5	90	50	90	3	8	2	5	5
23	1	0.2	1	2	111	2	40	40	20	25	10	10	80	40	85	2	9	1	3	4
23	1	0.5	1	2	111	2	50	30	20	15	5	5	90	10	30	2	8	1	2	3
23	2	0.4	1	2	111	2	65	25	10	15	5	10	85	60	50	3	7	2	3	4
23	2	1.2	1	1	1	2	60	25	15	25	5	25	70	20	70	5	8	1	3	5
24	1	1	1	2	111	2	65	20	15	20	5	5	90	50	80	3	9	2	4	5
23	2	1.3	1	1	1	2	90	5	5	45	80	10	10	30	40	5	8	2	3	4
24	1	0.7	1	2	111	2	90	5	5	40	80	10	10	40	45	8	7	2	3	4
24	1	0.9	1	2	111	2	80	10	10	45	10	10	80	35	75	3	7	2	3	4
25	2	1.4	1	1	1	2	65	25	15	35	15	15	70	35	90	2	7	4	5	4
23	1	0.4	1	2	111	2	60	30	10	10	15	15	70	20	80	2	6	2	2	4
23	1	0.4	1	2	111	2	30	30	60	12	5	5	90	35	95	4	8	2	4	5
23	2	0.3	1	2	111	2	40	40	20	10	10	10	80	40	85	3	9	2	3	4
23	1	0.5	1	2	111	2	50	25	25	15	5	5	90	40	65	2	7	1	3	3
24	2	0.4	1	2	111	2	60	30	10	10	5	10	85	40	50	4	7	2	2	4
23	2	0.7	1	2	111	2	60	30	10	10	10	20	70	20	75	5	8	1	3	5
25	1	1.8	1	1	1	2	70	15	15	20	60	20	20	40	70	8	10	6	5	6
23	1	1.4	1	1	1	2	25	35	40	10	5	15	80	30	80	1	7	1	3	3
24	2	0.4	1	2	111	2	65	30	5	5	10	20	70	20	95	2	6	2	3	3
23	1	0.4	1	2	111	2	60	30	10	5	15	15	70	45	80	2	6	1	2	4
23	1	0.6	1	2	111	2	30	30	60	12	5	5	90	50	90	4	8	2	4	5
23	1	0.6	1	2	111	2	40	40	20	10	10	10	80	45	85	2	9	1	3	4
23	1	0.5	1	2	111	2	50	25	25	15	10	10	80	45	40	2	7	2	2	3
23	2	0.6	1	2	111	2	60	30	10	5	5	10	85	60	50	6	7	2	2	4
24	2	0.7	1	2	111	2	60	30	10	10	10	20	70	40	70	5	8	2	3	5
23	1	0.8	1	2	111	2	65	20	15	20	10	10	80	40	80	4	9	2	4	5
23	2	1	1	2	111	2	80	10	10	50	80	15	5	25	40	3	10	1	2	4
23	2	1	1	2	111	2	75	15	10	50	25	25	50	80	50	1	8	2	3	2
23	2	0.5	1	2	111	2	70	20	10	25	43	30	17	83	90	5	10	1	4	10
32	1	4	4	1	1	2	60	20	20	10	10	20	70	40	10	10	10	2	10	10
25	1	1	1	2	111	2	50	30	10	20	10	40	50	50	40	7	8	2	6	8
29	1	4	1	1	1	2	80	15	5	25	80	15	5	30	35	5	10	1	2	5
29	2	4	4	1	1	2	60	20	20	15	20	20	60	45	40	10	10	3	3	3
27	2	2	4	1	1	2	90	5	5	15	5	75	20	35	30	4	10	3	10	10
25	2	1	1	2	111	2	5	90	5	50	20	10	70	35	35	5	8	5	9	10
25	1	1	1	2	111	2	25	70	5	10	10	40	50	50	60	3	7	2	5	10
25	1	2	4	1	1	2	80	10	10	15	15	60	25	40	50	10	8	2	8	8
28	2	2	1	2	111	2	5	90	5	50	15	15	70	30	35	6	8	3	9	10

## Sheet: Sheet2
Coding:
Gender: Males: 1, Females: 2
Experience in years: if > 1 exact, if < 1 for example 8 months then it is 0.8
Category: if Intern 1; MO PHC / CHC 2; PG 3; Staff 4; Programme Officer 5;
Specialization: if yes 1; if no 2;. If 1 then next column ie,
Type: Physician 1; OBG 2; Surgeon 3; orthopaediacian 4; paediatrician 5
Country code
1= India
2= Pakistan
3= Bangladesh
